# Supplementary material for: Anti PD-1 treatment increases [18F]FDG uptake by cancer cells in a mouse B16F10 melanoma model
Source: Springer Nature journal article supplement (doi:10.1186/s13550-018-0433-1), 2018-08-16
Supplement: MOESM1 [file 16041594]

*Anti PD-1 treatment increases [<sup>18</sup>F]FDG uptake by cancer cells in a mouse B16F10*

*melanoma model*

*Supporting information*

Mayu Tomita<sup>1</sup>, Hironobu Yasui<sup>2</sup>, Kei Higashikawa<sup>2</sup>, Kohei Nakajima<sup>1</sup>, Hideo Takakura<sup>1</sup>, Tohru Shiga<sup>3</sup>, Yuji Kuge<sup>2</sup>, Mikako Ogawa<sup>1</sup>

<sup>1</sup>Graduate School of Pharmaceutical Sciences, Hokkaido University, Sapporo, Japan

<sup>2</sup>Central Institute of Isotope Science, Hokkaido University, Sapporo, Japan

<sup>3</sup>Graduate School of Medicine, Hokkaido University, Sapporo, Japan

**Corresponding author:** Mikako Ogawa, Laboratory of Bioanalysis and Molecular Imaging, Graduate School of Pharmaceutical Sciences, Hokkaido University, Sapporo, Hokkaido 060-0812, Japan.

Phone: +81-11-706-3767, Fax: +81-11-706-3767.

E-mail: mogawa@pharm.hokudai.ac.jp

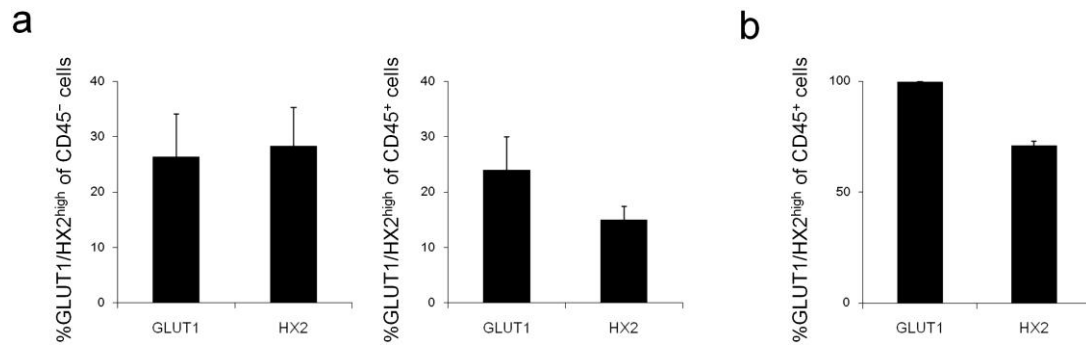

**Fig. S1**

Flow-cytometry analysis of metabolism of glucose. **a**, Flow-cytometry analysis of high expression cells of glucose metabolism markers; GLUT1 and hexokinase II. Values represent percentage of CD45<sup>-</sup> cancer cells (left) or CD45<sup>+</sup> immune cells (right) in tumor on day 0 (n = 5).

**b**, Flow-cytometry analysis of high expression cells of glucose metabolism markers; GLUT1 and hexokinase II of CD45<sup>+</sup> immune cells in spleen on day 0 (n = 5). Data represent mean ± SEM

**Table S1**

Complete data about flow-cytometry analysis of high expression cells of glucose metabolism markers; GLUT1 and hexokinase II of CD45<sup>+</sup> immune cells in spleen on day 7.

| Group         | Mouse   | %GLUT1 <sup>high</sup> of CD45 <sup>+</sup> cells | %HX2 <sup>high</sup> of CD45 <sup>+</sup> cells |
|---------------|---------|---------------------------------------------------|-------------------------------------------------|
| Treatment     | mouse1  | 99.57                                             | 51.55                                           |
|               | mouse2  | 99.79                                             | 51.53                                           |
|               | mouse3  | 99.96                                             | 87.54                                           |
|               | mouse4  | 99.76                                             | 92.89                                           |
|               | mouse5  | 99.92                                             | 92.86                                           |
|               | mouse6  | 99.62                                             | 88.39                                           |
|               | Average | 99.77                                             | 77.46                                           |
|               | SEM     | 0.06                                              | 8.25                                            |
| Group         | Mouse   | %GLUT1 <sup>high</sup> of CD45 <sup>+</sup> cells | %HX2 <sup>high</sup> of CD45 <sup>+</sup> cells |
| Non-treatment | mouse7  | 99.66                                             | 53.40                                           |
|               | mouse8  | 99.29                                             | 55.35                                           |
|               | mouse9  | 99.74                                             | 88.43                                           |
|               | mouse10 | 99.72                                             | 95.62                                           |
|               | mouse11 | 99.26                                             | 91.79                                           |
|               | mouse12 | 99.44                                             | 88.76                                           |
|               | Average | 99.52                                             | 78.89                                           |
|               | SEM     | 0.09                                              | 7.83                                            |
